# Supplementary material for: Alleviated Mn2+ dissolution drives long-term cycling stability in ultrafine Mn3O4/PPy core–shell nanodots for zinc-ion batteries
Source: Royal Society of Chemistry journal article supplement (doi:10.1039/d1ta09237e), 2021-01-01
Supplement: d1ta09237e1.pdf [file d1ta09237e1.pdf]

**Supplementary information**

**Alleviated Mn<sup>2+</sup> dissolution drives long-term cycling stability in  
ultrafine Mn<sub>3</sub>O<sub>4</sub>/PPy core-shell nanodots for zinc-ion battery**

Le Jiang, Fei Ye, Zeyi Wu, Lin Zhang, Qiang Liu, Zilong Tang, Linfeng Hu\*

[1] L. Jiang, Z. Y. Wu, L. Zhang, Prof. L. F. Hu

Department of Materials Science, Fudan University

Shanghai 200433 (P. R. China)

[2] Prof. L. F. Hu, Dr. Y. Fei, Q. Liu

School of Materials Science and Engineering, Southeast University, Nanjing, 211189, P.  
R. China \*Email: [linfenghu@seu.edu.cn](mailto:linfenghu@seu.edu.cn)

[3] Prof. Z. L. Tang

State Key Laboratory of New Ceramics and Fine Processing, School of Materials Science  
and Engineering, Tsinghua University, Beijing 100084, China

Fig. S1-Fig. S13

Table S1

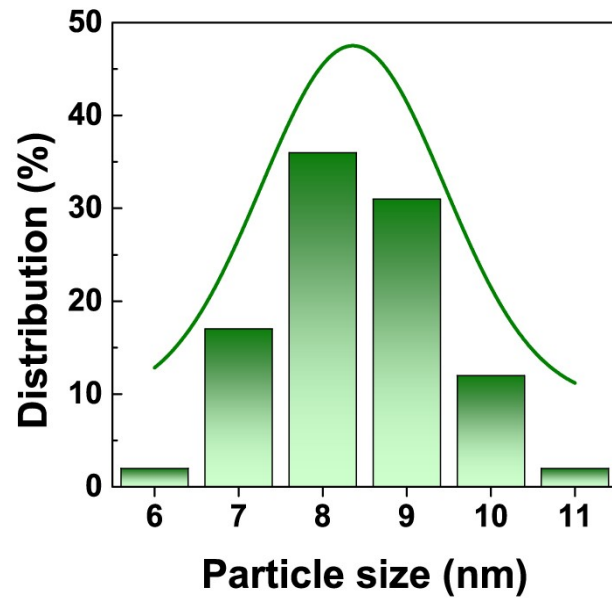

**Fig. S1** Size distribution of the as-prepared Mn<sub>3</sub>O<sub>4</sub>/PPy nanodots.

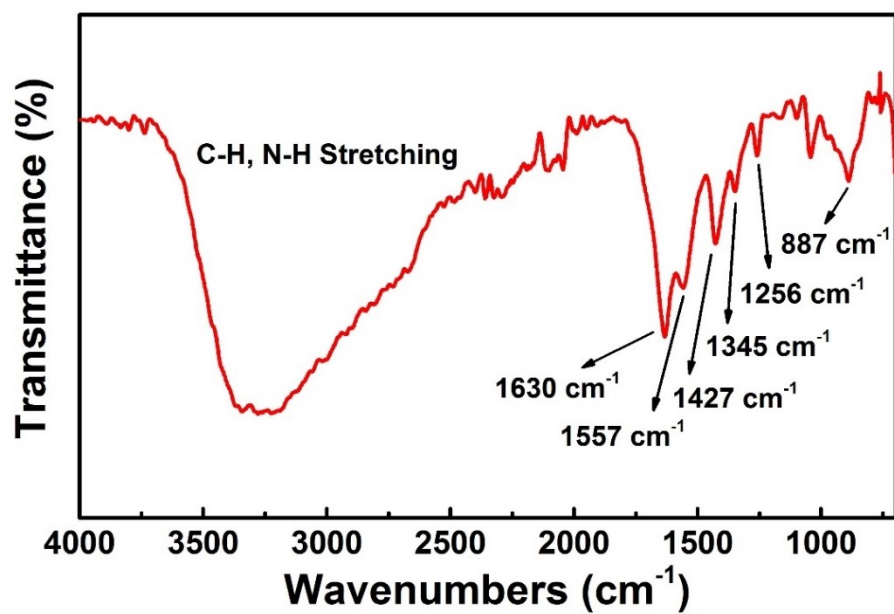

**Fig. S2** High-resolution FTIR spectrum (4000 – 700 cm<sup>-1</sup>) of Mn<sub>3</sub>O<sub>4</sub>/PPy nanodots.

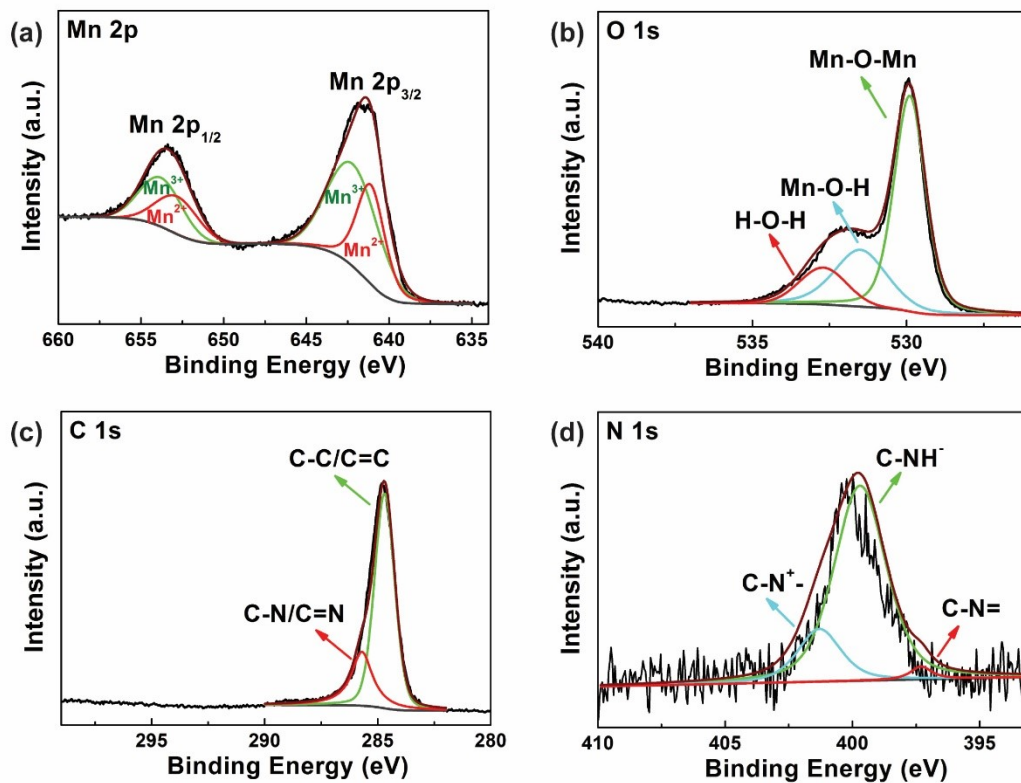

**Fig. S3** X-ray photoelectron spectroscopy (XPS) spectra of (a) Mn 2p, (b) O 1s, (c) C 1s, and (d) N 1s for  $Mn_3O_4/PPy$  nanodots.

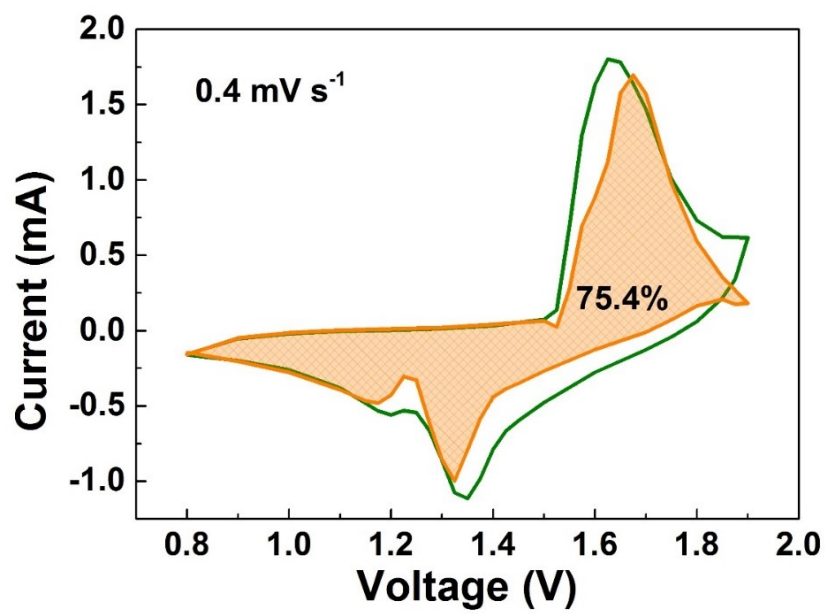

**Fig. S4** Capacitive contribution (shaded) to the total  $\text{Zn}^{2+}$  storage capacity at the scan rate of  $0.4 \text{ mV s}^{-1}$  of the  $\text{Mn}_3\text{O}_4/\text{PPy}$  nanodots.

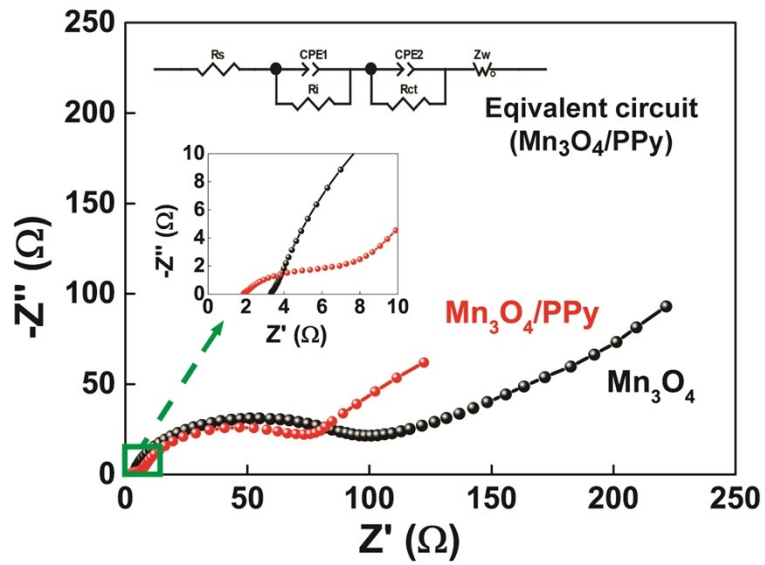

**Fig. S5** Nyquist plots of both cathodes before cycling and the corresponding fitting equivalent circuit of  $\text{Mn}_3\text{O}_4/\text{PPy}$  cathode (inset).

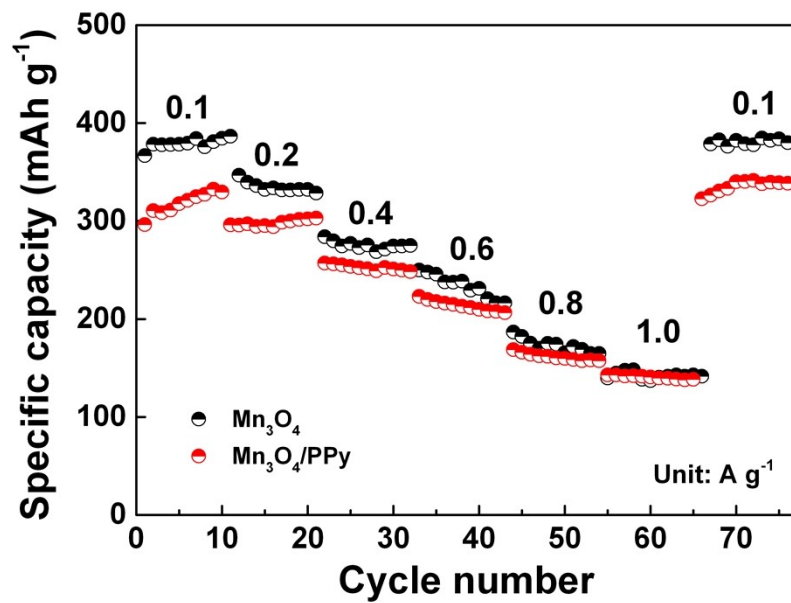

**Fig. S6** Rate performance of the Zn- $\text{Mn}_3\text{O}_4$  and Zn- $\text{Mn}_3\text{O}_4/\text{PPy}$  batteries.

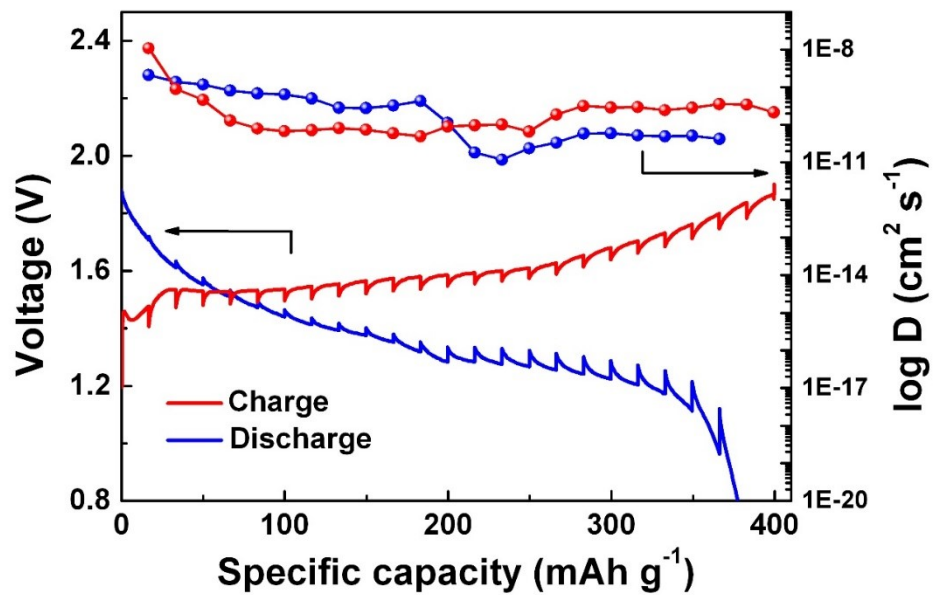

**Fig. S7** GITT profiles and the corresponding calculated ion diffusion coefficient of the  $\text{Mn}_3\text{O}_4/\text{PPy}$  nanodot battery during charge and discharge process.



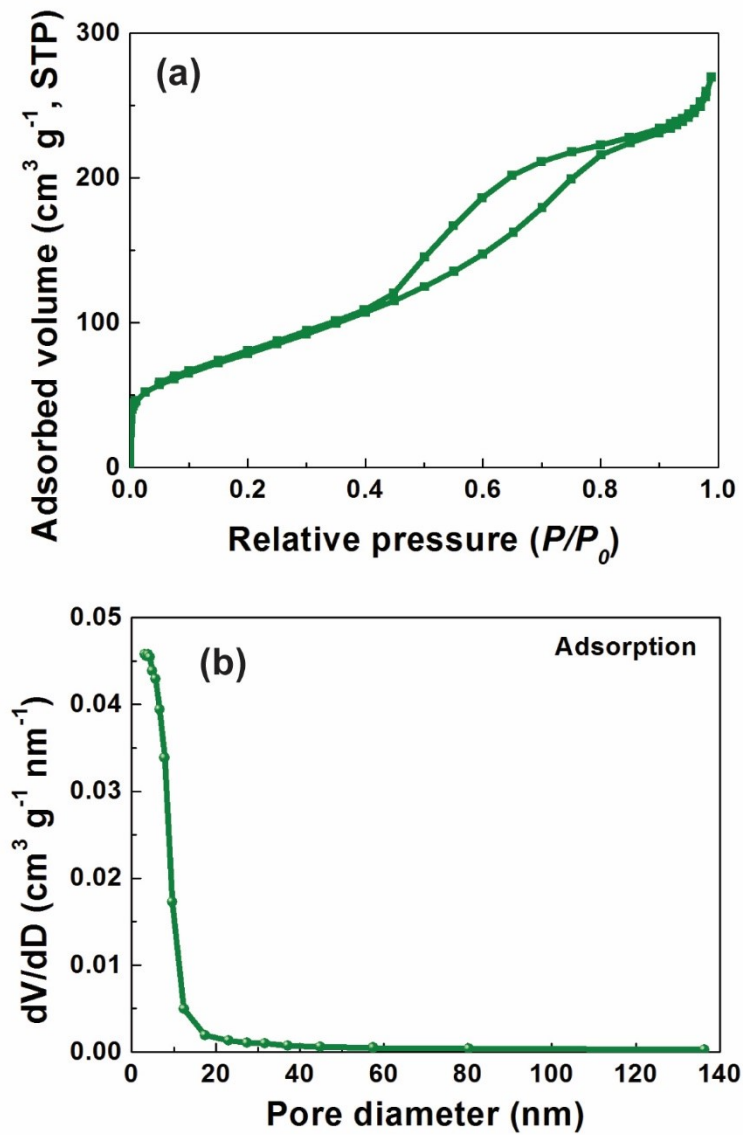

**Fig. S8** (a) N<sub>2</sub> isothermal adsorption curve and (b) the corresponding pore size distribution curve of Mn<sub>3</sub>O<sub>4</sub>/PPy nanodots.

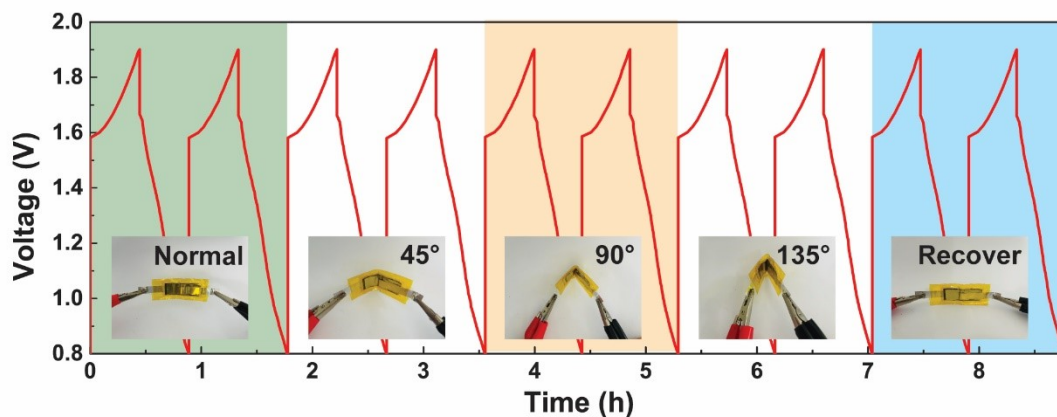

**Fig. S9** Charge/discharge curves (voltage *versus* time) of a single flexible Zn-Mn<sub>3</sub>O<sub>4</sub>/PPy battery at different bending angles.

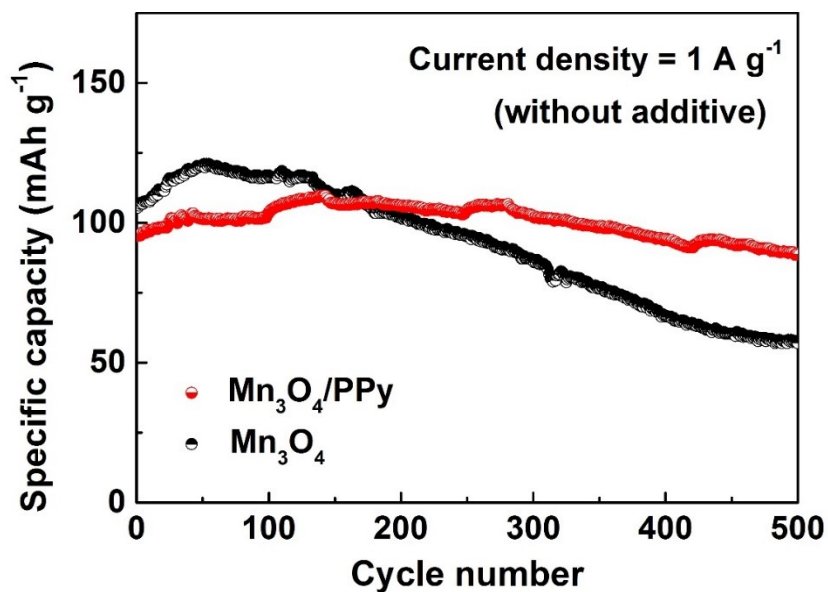

**Fig. S10** Cycling performance of Mn<sub>3</sub>O<sub>4</sub> and Mn<sub>3</sub>O<sub>4</sub>/PPy in electrolyte without MnSO<sub>4</sub> additive at 1.0 A g<sup>-1</sup> for 500 cycles.

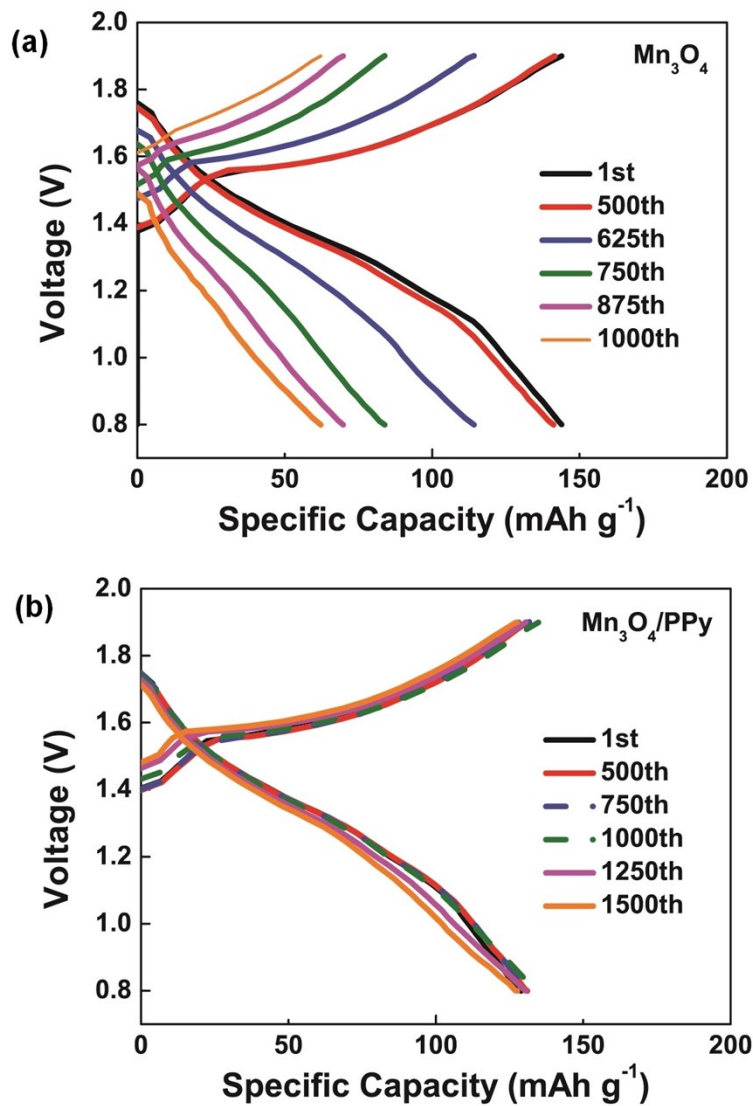

**Fig. S11** Charge/discharge profiles of (a) Mn<sub>3</sub>O<sub>4</sub> and (b) Mn<sub>3</sub>O<sub>4</sub>/PPy at different cycling times at 1.0 A g<sup>-1</sup>.

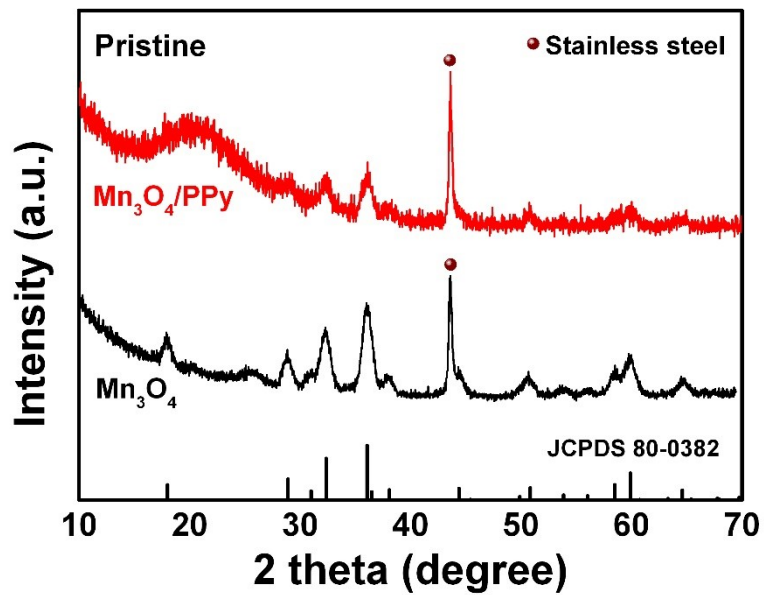

**Fig. S12** *Ex situ* XRD patterns of Mn<sub>3</sub>O<sub>4</sub> nanodot and Mn<sub>3</sub>O<sub>4</sub>/PPy composite cathode before cycle.

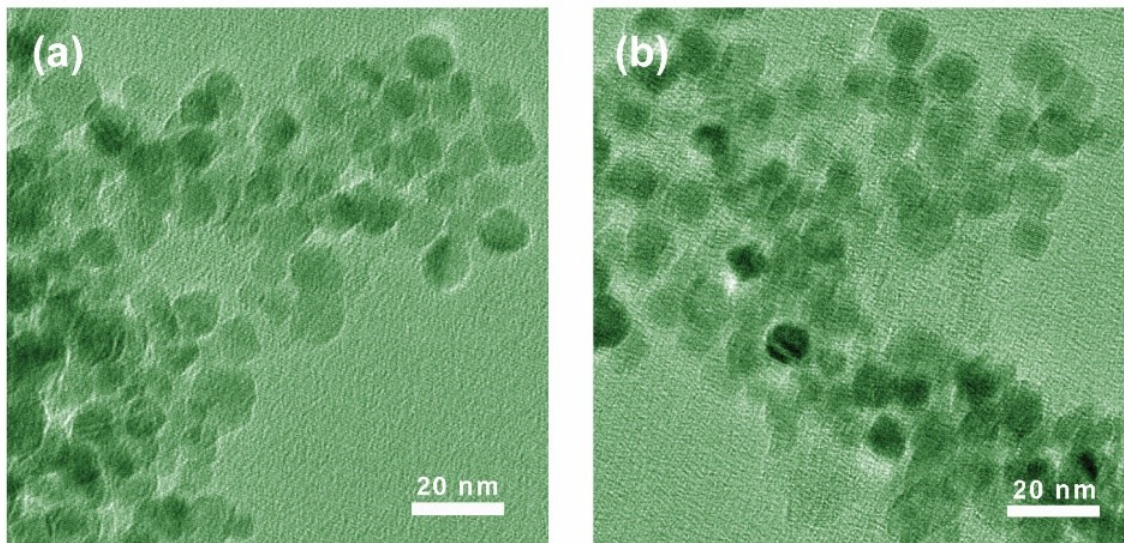

**Fig. S13** Low magnified TEM images of (a)  $\text{Mn}_3\text{O}_4/\text{PPy-lp}$  and (b)  $\text{Mn}_3\text{O}_4/\text{PPy-mp}$  core-shell nanodots, respectively.

**Table S1.** The comparison for electrochemical performance of various Mn<sub>3</sub>O<sub>4</sub>-related cathode materials in ZIBs.

| Cathode                                    | Specific capacity<br>at 0.1 A g <sup>-1</sup> | Cycling performance                              | Ref#       |
|--------------------------------------------|-----------------------------------------------|--------------------------------------------------|------------|
| Mn <sub>3</sub> O <sub>4</sub> /PPy        | 332.5 mA h g <sup>-1</sup>                    | 92.5% after 1500 cycles at 1.0 A g <sup>-1</sup> | This work. |
| Mn <sub>3</sub> O <sub>4</sub> @C          | 323.2 mA h g <sup>-1</sup>                    | 77% after 200 cycles at 0.5 A g <sup>-1</sup>    | 1          |
| Mn <sub>3</sub> O <sub>4</sub> (50~100 nm) | 239.2 mA h g <sup>-1</sup>                    | ~70% after 300 cycles at 0.5 A g <sup>-1</sup>   | 2          |
| Mn <sub>3</sub> O <sub>4</sub> nanoflower  | 296 mA h g <sup>-1</sup>                      | ~67% after 500 cycles at 0.5 A g <sup>-1</sup>   | 3          |
| Ball-milled Mn <sub>3</sub> O <sub>4</sub> | 221 mA h g <sup>-1</sup>                      | ~80% after 500 cycles at 0.5 A g <sup>-1</sup>   | 4          |
| Mn <sub>3</sub> O <sub>4</sub> nanodots    | 386.7 mA h g <sup>-1</sup>                    | ~85% after 500 cycles at 0.5 A g <sup>-1</sup>   | 5          |
| MCM4@ Mn <sub>3</sub> O <sub>4</sub>       | ~300 mA h g <sup>-1</sup>                     | ~85% after 1000 cycles at 0.6 A g <sup>-1</sup>  | 6          |
| Mn <sub>3</sub> O <sub>4</sub> @NC         | 280 mA h g <sup>-1</sup>                      | ~75% after 500 cycles at 1.0 A g <sup>-1</sup>   | 7          |
| Mn <sub>3</sub> O <sub>4</sub> /GO         | 215.6 mA h g <sup>-1</sup>                    | ~75% after 500 cycles at 1.0 A g <sup>-1</sup>   | 8          |

## Note and references

- 1 H. Chen, W. Zhou, D. Zhu, Z. Liu, Z. Feng, J. Li and Y. Chen, *J. Alloy. Compd.*, 2020, **813**, 151812.
- 2 J. Hao, J. Mou, J. Zhang, L. Dong, W. Liu, C. Xu and F. Kang, *Electrochim. Acta*, 2018, **259**, 170-178.
- 3 C. Zhu, G. Fang, J. Zhou, J. Guo, Z. Wang, C. Wang, J. Li, Y. Tang and S. Liang, *J. Mater. Chem. A*, 2018, **6**, 9677-9683.
- 4 L. Wang, X. Cao, L. Xu, J. Chen and J. Zheng, *ACS Sustain. Chem. Eng.*, 2018, **6**, 16055-16063.
- 5 L. Jiang, Z. Wu, Y. Wang, W. Tian, Z. Yi, C. Cai, Y. Jiang and L. Hu, *ACS Nano*, 2019, **13**, 10376-10385.
- 6 Q. Gao, D. Li, X. Liu, Y. Wang, W. Liu, M. Ren, F. Kong, S. Wang and R. Zhou, *Electrochim. Acta*, 2020, **335**, 135642.
- 7 M. Sun, D. S. Li, Y. F. Wang, W. L. Liu, M. M. Ren, F. G. Kong, S. J. Wang, Y. Z. Guo and Y. M. Liu, *ChemElectroChem*, 2019, **6**, 2510-2516.
- 8 Z. Huang, Y. Duan, Q. Jing, M. Sun, B. Tang and S. Shi, *J. Alloy. Compd.*, 2021, **864**, 158316.
